# Supplementary material for: Peroxidase-like activity of hollow sphere-like FeS2/SC boosted by synergistic action of defects and S–C bonding
Source: Royal Society of Chemistry journal article supplement (doi:10.1039/d3dt00044c), 2023-01-01
Supplement: d3dt00044c1.pdf [file d3dt00044c1.pdf]

## Supporting information

### **Peroxidase-like Activity of Hollow Sphere-like FeS<sub>2</sub>/SC Boosted by Synergistic Action of Defects and S-C Bonding**

Hao Tan and Zhaodong Nan

**Table S1.** Mass fraction of FeS<sub>2</sub> loading in FeS<sub>2</sub>/SC determined by ICP-AES.

| FeS <sub>2</sub> /SC       | FeS <sub>2</sub> /SC<br>(mg/L) | Fe amount<br>(mg/L) | Mass fraction of<br>FeS <sub>2</sub> (%) |
|----------------------------|--------------------------------|---------------------|------------------------------------------|
| FeS <sub>2</sub> /SC-2.5%  | 1000                           | 453.8               | 97.5                                     |
| FeS <sub>2</sub> /SC-5.0%  | 1000                           | 442.2               | 95.0                                     |
| FeS <sub>2</sub> /SC-5.3%  | 1000                           | 440.8               | 94.7                                     |
| FeS <sub>2</sub> /SC-7.5%  | 1000                           | 430.5               | 92.5                                     |
| FeS <sub>2</sub> /SC-10.0% | 1000                           | 418.9               | 90.0                                     |
| FeS <sub>2</sub> /SC-12.5% | 1000                           | 407.3               | 87.5                                     |

**Response Surface Methodology (RSM).** The experimental temperature was fixed at 25 °C, the concentrations of H<sub>2</sub>O<sub>2</sub> and TMB were 60 μM and 1.2 mM, respectively, and the reaction time was 1 min. Response Surface Methodology (RSM) based on BBD (Box-Behnken Design) was used to optimize the experimental conditions. A second-order polynomial equation was obtained as the following,

$$y = 2.05 - 0.425X_1 + 0.0737X_2 + 0.0613X_3 - 0.0175X_1X_2 + 0.0075X_1X_3 - 0.02X_2X_3 - 0.796X_1^2 - 0.1785X_2^2 - 0.2185X_3^2 \quad (1)$$

where  $X_1$ ,  $X_2$ , and  $X_3$  present solution pH, nanozymic concentration ( $\mu\text{g/mL}$ ), and the content of the carbon in  $\text{FeS}_2/\text{SC}$  (wt%),  $y$  is the absorbance value of the solution at 652 nm ( $A_{652\text{nm}}$ ). The reaction conditions were obtained according to the maximum value of  $y$ .

The values of  $X_1$ ,  $X_2$ , and  $X_3$  were selected as listed in Table S2. For example, the experimental result indicated that  $A_{652\text{nm}}$  reached the highest at  $\text{pH} = 4.0$  among pH values (3.5, 4.0, 4.5, 5.0, 5.5, and 6.0). Thus,  $X_1$  was selected as 3.5, 4.0, and 4.5. Table S2 lists the results ( $A_{652\text{nm}}$ ) obtained through the experiment and the calculated based on Eq. (1), indicating that Eq. (1) can be used as a model to predict the experimental result. The individual and mutual effects between  $y$  and  $X$  ( $X_1$ ,  $X_2$ , and  $X_3$ ) were studied by two-dimensional (2D) contour lines and three-dimensional (3D) surface maps. All 2D contour lines were elliptic contour lines in Figures S1A and D, indicating that the interaction was significant.<sup>1</sup> Figures S1B and E show the interaction between pH and the content of the carbon in  $\text{FeS}_2/\text{SC}$ . Figures S1C and F reflect the effect of nanozymic concentration and the content of the carbon in  $\text{FeS}_2/\text{SC}$ . The optimized conditions were obtained as pH 3.83, nanozymic concentration 255  $\mu\text{g/mL}$ , and the content of the carbon in  $\text{FeS}_2/\text{SC}$  5.31 wt%.

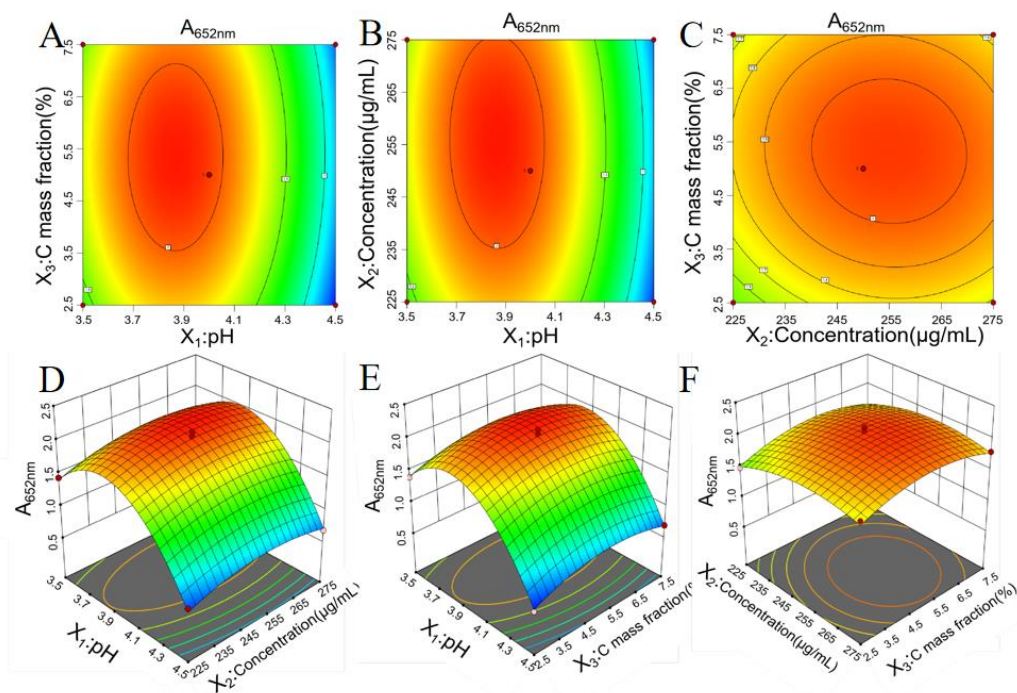

**Figure S1.** 2D contour diagram and 3D surface diagram of the influence of various factors on POD activity ( $A_{652}$ ), (A) and (D)  $X_1$  and  $X_2$  ( $X_3 = 5.0$ ), (B) and (E)  $X_1$  and  $X_3$  ( $X_2 = 250$ ), (C) and (F)  $X_2$  and  $X_3$  ( $X_1 = 4.0$ ).

**Table S2.** Experimental and calculated results based on Eq. (1).

| Run | $X_1$ | $X_2$ ( $\mu\text{g/mL}$ ) | $X_3$ (wt%) | $y$          |            |
|-----|-------|----------------------------|-------------|--------------|------------|
|     |       |                            |             | Experimental | calculated |
| 1   | 3.5   | 225                        | 5.0         | 1.44         | 1.41       |
| 2   | 4.5   | 225                        | 5.0         | 0.65         | 0.60       |
| 3   | 3.5   | 275                        | 5.0         | 1.54         | 1.59       |
| 4   | 4.5   | 275                        | 5.0         | 0.68         | 0.71       |
| 5   | 3.5   | 250                        | 2.5         | 1.40         | 1.41       |
| 6   | 4.5   | 250                        | 2.5         | 0.51         | 0.54       |
| 7   | 3.5   | 250                        | 7.5         | 1.55         | 1.52       |
| 8   | 4.5   | 250                        | 7.5         | 0.69         | 0.68       |
| 9   | 4.0   | 225                        | 2.5         | 1.48         | 1.50       |
| 10  | 4.0   | 275                        | 2.5         | 1.75         | 1.69       |
| 11  | 4.0   | 225                        | 7.5         | 1.6          | 1.66       |
| 12  | 4.0   | 275                        | 7.5         | 1.79         | 1.77       |
| 13  | 4.0   | 250                        | 5.0         | 1.97         | 2.05       |
| 14  | 4.0   | 250                        | 5.0         | 2.01         | 2.05       |
| 15  | 4.0   | 250                        | 5.0         | 2.10         | 2.05       |
| 16  | 4.0   | 250                        | 5.0         | 2.05         | 2.05       |
| 17  | 4.0   | 250                        | 5.0         | 2.08         | 2.05       |

In order to further evaluate the adequacy and significance of the model, a linear graph was obtained with a good correlation ( $R^2 = 0.9916$ ) and a slope of 0.99213 between the predicted value of the model and the experimental value as shown in Figure S2, indicating that the model fit was significant. In addition, the residual distribution diagram is also an important factor to evaluate whether the model fitting results are significant in Figure. S3,<sup>2</sup> which fits well with the straight line, indicating no serious non-normality.<sup>3</sup> It can be seen in Figure. S4 that the residual was distributed between -3.0 and +3.0. The results prove that the model well represents the relationship between  $A_{652nm}$  ( $y$ ) and independent variables ( $X_1$ ,  $X_2$ , and  $X_3$ ).<sup>3</sup> ANOVA analysis was performed on the model as given in Table S3. F-value was 98.05 and P-value  $>0.0001$ , indicating that the model was significant. The comparison of F-values of each variable factor can reflect the influence on the dependent variable ( $A_{652nm}$ ).<sup>4</sup> The results show that the influence capacity of  $A_{652nm}$  is  $X_1 > X_2 > X_3$ . "Lack of Fit F-value" is 1.30, indicating that "Lack of Fit" is not significant compared with the pure error. The second-order polynomial model coefficient ( $R^2$ ) and adjustment coefficient (Adjust  $R^2$ ) are 0.9921 and 0.9820, indicating that the model response value is in good agreement with the experimental value.<sup>5</sup> The variance coefficient (C.V.%) is 4.90, indicating that the model has high accuracy and reliability.<sup>6</sup>

**Table S3** ANOVA for  $A_{652\text{ nm}}$  from BBD.

| Source      | Sum of Squares | df | Mean Square              | F-value | p-value  |                 |
|-------------|----------------|----|--------------------------|---------|----------|-----------------|
| Model       | 4.71           | 9  | 0.5233                   | 98.05   | < 0.0001 | significant     |
| $X_1$       | 1.44           | 1  | 1.44                     | 270.78  | < 0.0001 |                 |
| $X_2$       | 0.0435         | 1  | 0.0435                   | 8.15    | 0.0245   |                 |
| $X_3$       | 0.0300         | 1  | 0.0300                   | 5.62    | 0.0495   |                 |
| $X_1X_2$    | 0.0012         | 1  | 0.0012                   | 0.2296  | 0.6465   |                 |
| $X_1X_3$    | 0.0002         | 1  | 0.0002                   | 0.0422  | 0.8432   |                 |
| $X_2X_3$    | 0.0016         | 1  | 0.0016                   | 0.2998  | 0.6010   |                 |
| $X_1^2$     | 2.67           | 1  | 2.67                     | 499.93  | < 0.0001 |                 |
| $X_2^2$     | 0.1342         | 1  | 0.1342                   | 25.14   | 0.0015   |                 |
| $X_3^2$     | 0.2010         | 1  | 0.2010                   | 37.67   | 0.0005   |                 |
| Residual    | 0.0374         | 7  | 0.0053                   |         |          |                 |
| Lack of Fit | 0.0185         | 3  | 0.0062                   | 1.30    | 0.3885   | not significant |
| Pure Error  | 0.0189         | 4  | 0.0047                   |         | .        |                 |
| Cor Total   | 4.75           | 16 |                          |         |          |                 |
| Std. Dev.   | 0.0731         |    | R <sup>2</sup>           | 0.9921  |          |                 |
| Mean        | 1.49           |    | Adjusted R <sup>2</sup>  | 0.9820  |          |                 |
| C.V. %      | 4.90           |    | Predicted R <sup>2</sup> | 0.9315  |          |                 |
|             |                |    | Adeq Precision           | 26.9198 |          |                 |

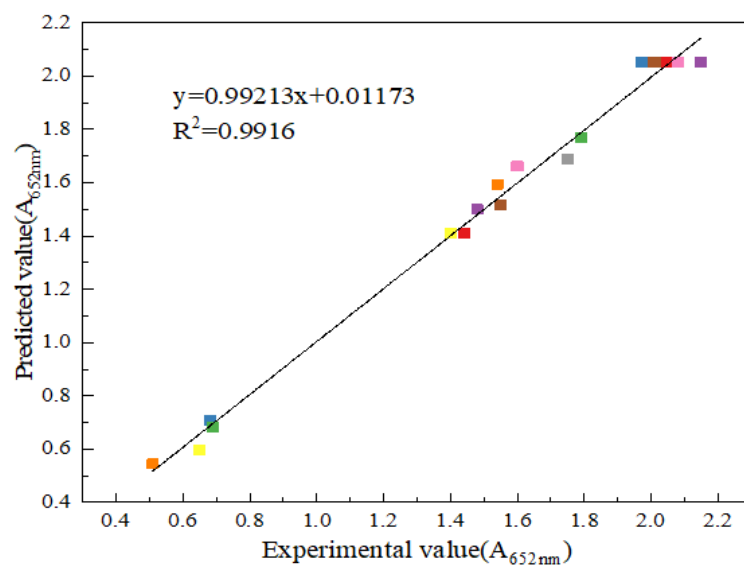

Figure S2. Predicted and experimental values of  $A_{652\text{nm}}$ .

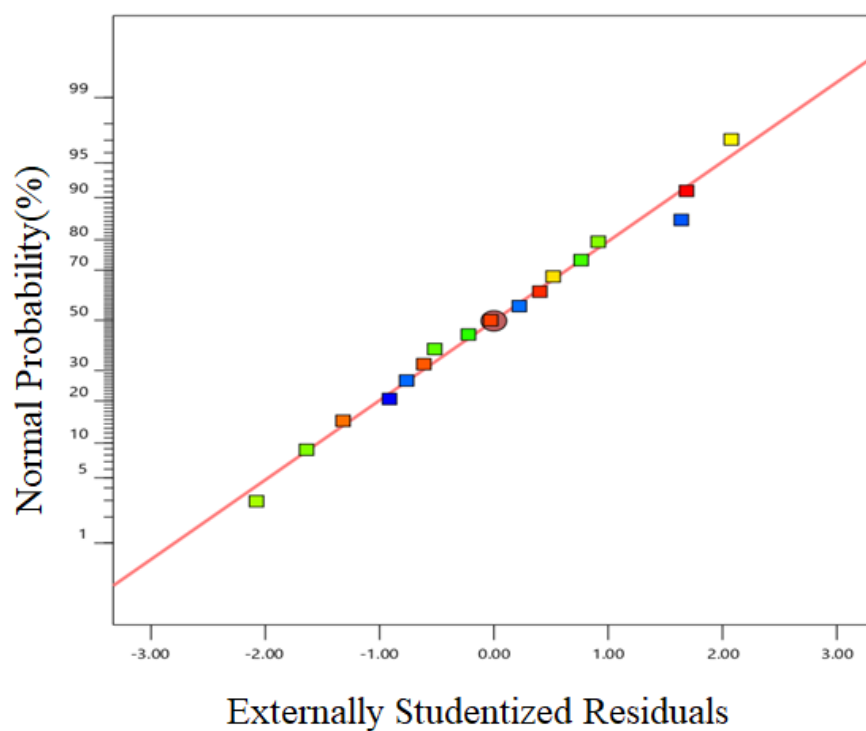

Figure S3. Normal probability plot of the internally studentized residuals for  $A_{652\text{nm}}$ .

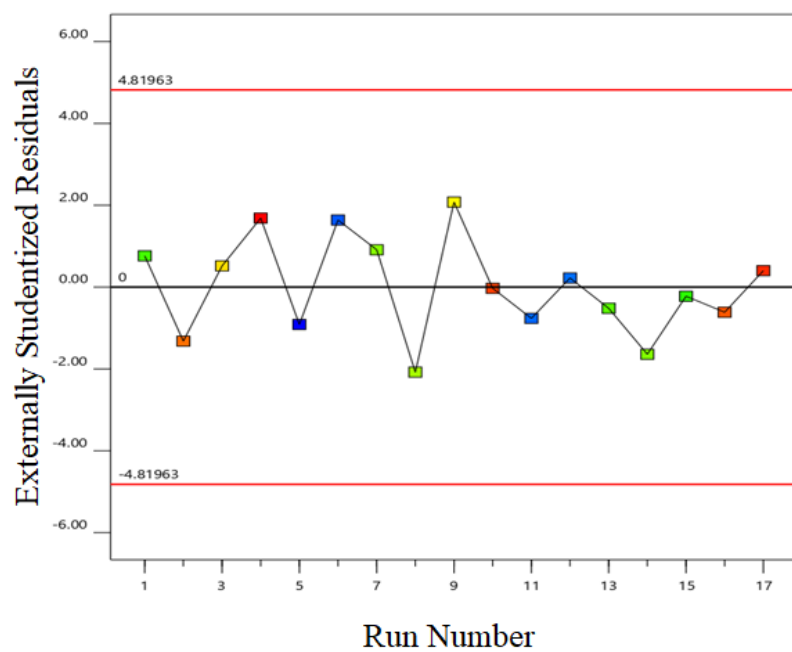

**Figure S4** The run number versus residual data for A<sub>652nm</sub>.

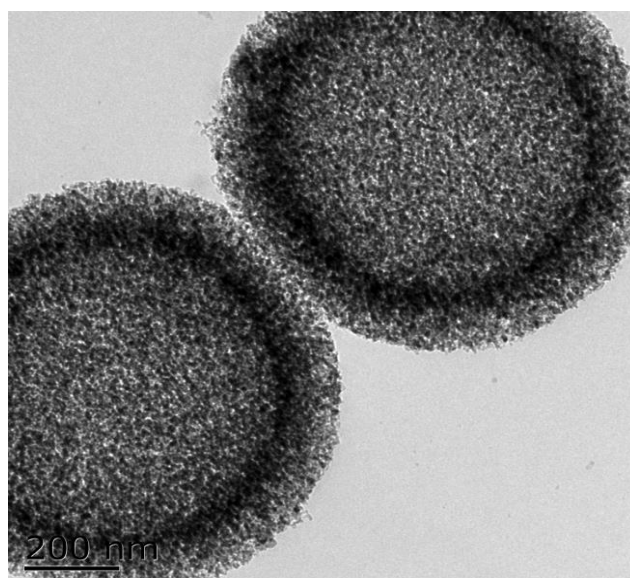

**Figure S5.** A TEM image of the hollow sphere-shaped carbon.



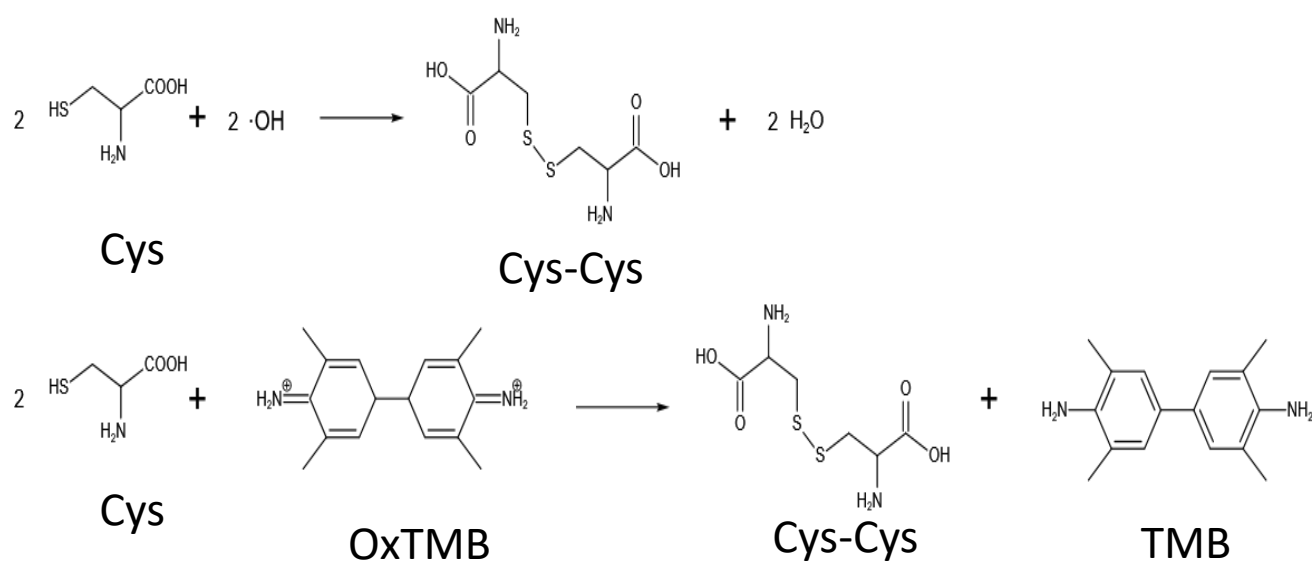

**Figure S6.** Mechanism of inhibiting oxidation of TMB by Cys.

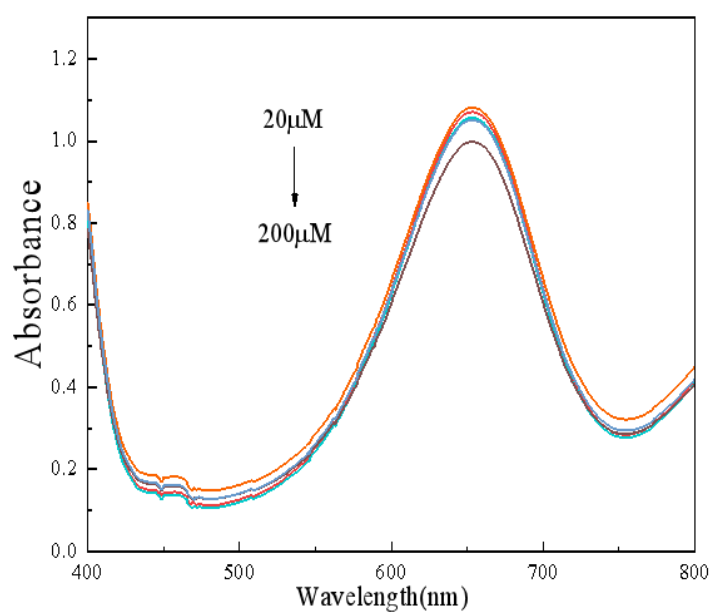

**Figure S7.** UV-vis absorbance spectra with different Cys concentrations from 20 to 200 μM with FeS<sub>2</sub>/SiO<sub>2</sub> as the nanozyme.

## REFERENCES

- [1] Xin, S.; Liu, G.; Ma, X.; Gong, J.; Ma, B.; Yan, Q.; Chen, Q.; Ma, D.; Zhang, G.; Gao, M.; Xin, Y. High Efficiency Heterogeneous Fenton-like Catalyst Biochar Modified CuFeO<sub>2</sub> for the Degradation of Tetracycline: Economical Synthesis, Catalytic Performance and Mechanism. *Appl. Catal. B Environ.* **2021**, *280*, 119386.
- [2] Chen, J.; Li, G.; Huang, Y.; Zhang, H.; Zhao, H.; An, T. Optimization Synthesis of Carbon Nanotubes-Anatase TiO<sub>2</sub> Composite Photocatalyst by Response Surface Methodology for Photocatalytic Degradation of Gaseous Styrene. *Appl. Catal. B Environ.* **2012**, *123 - 124*, 69 - 77.
- [3] Hazime, R.; Nguyen, Q. H.; Ferronato, C.; Huynh, T. K. X.; Jaber, F.; Chovelon, J. M. Optimization of Imazalil Removal in the System UV/TiO<sub>2</sub>/K<sub>2</sub>S<sub>2</sub>O<sub>8</sub> Using a Response Surface Methodology (RSM). *Appl. Catal. B Environ.* **2013**, *132 - 133*, 519 - 526.
- [4] Xu, J.; Xing, Y.; Liu, Y.; Liu, M.; Hou, X. Facile in Situ Microwave Synthesis of Fe<sub>3</sub>O<sub>4</sub>@MIL-100(Fe) Exhibiting Enhanced Dual Enzyme Mimetic Activities for Colorimetric Glutathione Sensing. *Anal. Chim. Acta* **2021**, *1179*, 338825.
- [5] Wang, M.; Zhang, B.; Cai, C.; Xin, Y.; Liu, H. Acidic Hydrothermal Treatment: Characteristics of Organic, Nitrogen and Phosphorus Releasing and Process Optimization on Lincomycin Removal from Lincomycin Mycelial Residues. *Chem. Eng. J.* **2018**, *336*, 436 - 444.

[6] Sulaiman, N. F.; Wan Abu Bakar, W. A.; Toemen, S.; Kamal, N. M.; Nadarajan, R. In Depth Investigation of Bi-Functional, Cu/Zn/ $\gamma$ -Al<sub>2</sub>O<sub>3</sub> Catalyst in Biodiesel Production from Low-Grade Cooking Oil: Optimization Using Response Surface Methodology. *Renew. Energy* **2019**, *135*, 408 – 416.
